# Supplementary material for: Tuning Promoter Strength through RNA Polymerase Binding Site Design in Escherichia coli
Source: PLoS Comput Biol. 2012 Dec 13;8(12):e1002811. doi: 10.1371/journal.pcbi.1002811 (PMC3521663; doi:10.1371/journal.pcbi.1002811)
Supplement: Text S5 — List of FISH probe sequences. A list of all 72 probes and their sequences used in the mRNA FISH protocol. (TXT) [file pcbi.1002811.s006.txt]

Name	sequence
lacZ_1	gtgaatccgtaatcatggtc
lacZ_2	tcacgacgttgtaaaacgac
lacZ_3	attaagttgggtaacgccag
lacZ_4	tattacgccagctggcgaaa
lacZ_5	attcaggctgcgcaactgtt
lacZ_6	aaaccaggcaaagcgccatt
lacZ_7	agtatcggcctcaggaagat
lacZ_8	aaccgtgcatctgccagttt
lacZ_9	taggtcacgttggtgtagat
lacZ_10	aatgtgagcgagtaacaacc
lacZ_11	gtagccagctttcatcaaca
lacZ_12	aataattcgcgtctggcctt
lacZ_13	agatgaaacgccgagttaac
lacZ_14	aattcagacggcaaacgact
lacZ_15	tttctccggcgcgtaaaaat
lacZ_16	atcttccagataactgccgt
lacZ_17	aacgagacgtcacggaaaat
lacZ_18	gctgatttgtgtagtcggtt
lacZ_19	ttaaagcgagtggcaacatg
lacZ_20	aactgttacccgtaggtagt
lacZ_21	ataatttcaccgccgaaagg
lacZ_22	tttcgacgttcagacgtagt
lacZ_23	atagagattcgggatttcgg
lacZ_24	ttctgcttcaatcagcgtgc
lacZ_25	accattttcaatccgcacct
lacZ_26	ttaacgcctcgaatcagcaa
lacZ_27	atgcagaggatgatgctcgt
lacZ_28	tctgctcatccatgacctga
lacZ_29	ttcatcagcaggatatcctg
lacZ_30	cacggcgttaaagttgttct
lacZ_31	tggttcggataatgcgaaca
lacZ_32	ttcatccaccacatacaggc
lacZ_33	tgccgtgggtttcaatattg
lacZ_34	atcggtcagacgattcattg
lacZ_35	tgatcacactcgggtgatta
lacZ_36	atacagcgcgtcgtgattag
lacZ_37	gatcgacagatttgatccag
lacZ_38	aaataatatcggtggccgtg
lacZ_39	tttgatggaccatttcggca
lacZ_40	tattcgcaaaggatcagcgg
lacZ_41	aagactgttacccatcgcgt
lacZ_42	tgccagtatttagcgaaacc
lacZ_43	aaacggggatactgacgaaa
lacZ_44	taatcagcgactgatccacc
lacZ_45	gggttgccgttttcatcata
lacZ_46	tcggcgtatcgccaaaatca
lacZ_47	ttcatacagaactggcgatc
lacZ_48	tggtgttttgcttccgtcag
lacZ_49	acggaactggaaaaactgct
lacZ_50	tattcgctggtcacttcgat
lacZ_51	gttatcgctatgacggaaca
lacZ_52	tttaccttgtggagcgacat
lacZ_53	gttcaggcagttcaatcaac
lacZ_54	ttgcactacgcgtactgtga
lacZ_55	agcgtcacactgaggttttc
lacZ_56	atttcgctggtggtcagatg
lacZ_57	acccagctcgatgcaaaaat
lacZ_58	cggttaaattgccaacgctt
lacZ_59	ctgtgaaagaaagcctgact
lacZ_60	ggcgtcagcagttgtttttt
lacZ_61	tacgccaatgtcgttatcca
lacZ_62	taaggttttcccctgatgct
lacZ_63	atcaatccggtaggttttcc
lacZ_64	gtaatcgccatttgaccact
lacZ_65	agttttcttgcggccctaat
lacZ_66	atgtctgacaatggcagatc
lacZ_67	ataattcaattcgcgcgtcc
lacZ_68	tgatgttgaactggaagtcg
lacZ_69	tcagttgctgttgactgtag
lacZ_70	attcagccatgtgccttctt
lacZ_71	aatccccatatggaaaccgt
lacZ_72	agaccaactggtaatggtag
